# Supplementary material
Source: publisher figshare collection journal article supplement (https://gsapubs.figshare.com/ndownloader/files/23307077)
Supplement: Supplementary file 1 [file 23307077]

# GSA Data Repository 2018076

Deccan volcanism caused coupled  $p\text{CO}_2$  and terrestrial temperature rises,  
and pre-impact extinctions in North China

**Authors:** Laiming Zhang, Chengshan Wang, Paul B. Wignall, Tobias Kluge,  
Xiaoqiao Wan, Qian Wang, Yuan Gao

This Data Repository entry contains:

- Supplementary Information
  - Geological Background
    - ◆ Stratigraphy
    - ◆ Age model
  - Materials and Methods
    - ◆ Sample collection
    - ◆ Sample preparation

- ◆ Sample preservation style
- ◆ Clumped isotope analyses
- ◆ Calculation of average stable and clumped isotope values
- ◆  $\Delta_{47}$ -Temperature calibrations
- ◆ Calculation of paleo-atmospheric CO<sub>2</sub> concentrations
- Supplementary References
- Supplementary Figures
  - Figure DR1 Schematic paleogeography map
  - Figure DR2 Age model
  - Figure DR3 Petrographic images
  - Figure DR4 The results of stable and clumped isotopes analyses
  - Figure DR5 The  $\delta^{18}\text{O}_{\text{water}}$  values (soil water) vs  $\Delta_{47}$  temperature
  - Figure DR6 A comparison between  $\Delta_{47}$  temperature from the Songliao Basin and North America

- Figure DR7 A comparison between analyses of same samples from different labs
- Figure DR8 Fossil range data from the Songliao Basin across the K-Pg boundary interval
- Supplementary Tables
  - Table DR1 Raw clumped isotope data in Johns Hopkins University
  - Table DR2 Raw clumped isotope data in Heidelberg University
  - Table DR3 Raw data for  $p\text{CO}_2$  record
  - Table DR4 Results of clumped isotope analyses.
  - Table DR5 A summary of climatic parameters.

## Geological Background

### Stratigraphy

The Songliao Basin is approximately 820 km long in a north-south direction and approximately 350 km wide in an east-west direction, and covers ~260,000 km<sup>2</sup> in NE China (Fig. 1). Paleomagnetic data indicate that Songliao Basin was located at mid-latitudes in the Cretaceous similar to where it is now (Wang et al., 2013a; Wang et al., 2013b) (Fig. DR1).

The basin is filled predominantly with volcanoclastic, alluvial fan, fluvial and lacustrine sediments of the Late Jurassic, Cretaceous and Paleogene ages (Wang et al., 2013a; Wang et al., 2013b). From the bottom to the top, the Mesozoic sedimentary cover within the basin are the Upper Jurassic Huoshiling Formation (J3h); the Lower Cretaceous Shahezi (K1sh), Yingcheng (K1y), Dengloulou (K1d), and Quantou (K1q) formations; the Upper Cretaceous Qinshankou (K2qn), Yaojia (K2y), Nenjiang (K2n), Sifangtai (K2s), and Mingshui (K2m) formations (Wang et al., 2013a).

The Late Cretaceous stratigraphy was recovered in a borehole named SK-In (north core) (44°12'44.22"N, 124°15'56.78"E; Fig. 1 and DR1) in the central part of Songliao Basin by the "Cretaceous Continental Scientific Drilling Program of China" (Wang et al., 2013a; Wang et al., 2013b). A high-temporal-resolution age model (Fig. DR2) was established for the SK-In borehole using a geomagnetic polarity sequence, U-Pb zircon ages, Milankovitch cycles, and biostratigraphic data (He et al., 2012; Deng et al., 2013; Wan et al., 2013; Wu et al., 2014; Wang et al., 2016).

Diverse lines of evidences place the K-Pg boundary in the top part of the Mingshui Formation (Li et al., 2011; Deng et al., 2013; Wan et al., 2013). According to the magnetostratigraphy, the chron C29r was recorded at the depth interval of 317.03-342.1 m in the north borehole (Deng et al., 2013), which corresponds to the top part of the Mingshui Formation. In addition, biostratigraphic studies also indicate major micropaleontologic changes in the top part of the Mingshui Formation (Li et al., 2011; Wan et al., 2013). The Sifangtai and Mingshui formations are composed of gray-green, gray, black and brown-red shale and gray-green sandstone, and consists of alluvial plain - shore to shallow lake - alluvial plain deposits across most of the basin (Wang et al., 2013a). They record a semi-humid, temperate environment developed during the post-rift phase of the basin (Chamberlain et al., 2013; Wang et al., 2013a).

#### Age model

The chronology of SK-In borehole has been well established using a combination of biostratigraphy (Wan et al., 2013), magnetostratigraphy (Deng et al., 2013), cyclostratigraphy (Wu et al., 2014) and radiometric ages (He et al., 2012; Wang et al., 2016) (Fig. DR2). Eleven magnetozones with five reversed, five normal and one mixed polarities were identified in SK-In (Deng et al., 2013). The lowermost geomagnetic reversal is interpreted as the C34n/C33r boundary based on a SIMS U-Pb zircon age of  $83.7 \pm 0.8$  Ma (He et al., 2012) and a CA-ID-TIMS U-Pb zircon age of  $83.07 \pm 0.15$  Ma (Wang et al., 2016) obtained from below the lowermost geomagnetic reversal. In the Sifangtai and Mingshui formations, the following

magnetozones are present: the lower part of C29r (317.0-342.1m), C30n-C31n (342.1-530.78m), C31r (530.78-700.88 m), and C32n (700.88-852.6m), C32r.1r (852.6-887.8m), C32r.1n (887.8-895.8m), C32r.2r (895.8-910.2m), C33n (910.2-1020.4m).

The 405 kyr eccentricity cycles were recognized using thorium (Th) data from the Sifangtai and Mingshui formations (Wu et al., 2014). The C30n/C29r boundary is very close to a minimum in the 405-kyr eccentricity cycle and about 300-400 ky older than the K-Pg boundary (Husson et al., 2011; Batenburg et al., 2014; Clyde et al., 2016). In the Mingshui Formation, the C30n/C29r boundary (66.398 Ma) (Gradstein et al., 2012) was set as the initial age control point and the maximum of the first 405 kyr eccentricity cycle above C30n/C29r boundary was set as the starting point. Then the maxima of the filtered 405 kyr sedimentary cycles were tuned to the maxima of the target 405 kyr eccentricity curve filtered from La2010d to establish an astronomical time scale (ATS) (Wu et al., 2014).

It is important to note that although the upper boundary for C29r is not clearly represented in the core, with C29r being overlaid by a “mixed polarity” interval, this does not have any influences on the age model. The location of the upper boundary for C29r was not used to determine the age model. The age model was established based on the 405 kyr eccentricity cycles recognized using thorium (Th) data from the Sifangtai and Mingshui formations and location of the C30n/C29r boundary, which are clearly determined.

In the ATS, the age of the C30n/C29r boundary is  $\sim 66.30 \pm 0.08$  Ma and the K-Pg boundary is  $\sim 66.001 \pm 0.014$  Ma, which is consistent with the GTS2012 (66.398

Ma and 66.04 Ma, respectively) (Gradstein et al., 2012) and results from marine strata (Husson et al., 2011; Batenburg et al., 2014). Recently, the CA-ID-TIMS U-Pb zircon ages of Deccan Traps have suggested that the age of the C30n/C29r boundary is very close to the base of the main Deccan phase at  $66.288 \pm 0.027$  Ma and the age of K-Pg boundary is  $65.968 \pm 0.085$  Ma (Schoene et al., 2015). The high-precision  $^{40}\text{Ar}/^{39}\text{Ar}$  data suggests the age of the C30n/C29r boundary is  $66.38 \pm 0.05$  Ma and the age of K-Pg boundary is  $66.043 \pm 0.086$  Ma (Renne et al., 2013; Renne et al., 2015). The U-Pb ages from CA-ID-TIMS analysis suggests the C30n/C29r boundary is  $66.436 \pm 0.039$  Ma and the age of K-Pg boundary is  $66.021 \pm 0.081$  Ma (Clyde et al., 2016). Therefore, the age model (ATS) of SK-In is reasonable and valid, and the age of each sample can be calculated (see supplementary Table DR4 “Depth and ATS ages in the SK-In borehole” in ref 5). In this study, the ages of paleosol carbonates were set at the burial depth of the paleosol surfaces, not the depths of the carbonate nodules themselves.

Although an iridium anomaly has not been located in SK-In, there are several locations proposed for the K-Pg boundary (Li et al., 2011; Deng et al., 2013; Wan et al., 2013). Based on a major palynofloral change, Li et al. (2011) suggested that the K-Pg boundary should be located above 360.6 m. Based on a magnetostratigraphic study, Deng et al. (2013) suggested that the K-Pg boundary should be located between 342.1-317.0 m. Based on the compiled data of charophytes, palynology, and magnetostratigraphy, Wan et al. (2013) suggested that the K-Pg boundary should be located at 328 m.

In this study, the K-Pg boundary was determined based on the ATS with resolution better than 0.1 Ma (Wu et al., 2014). As we mentioned above, the C30n/C29r boundary is about 300-340 ky older than the K-Pg boundary (Husson et al., 2011; Batenburg et al., 2014). With the C30n/C29r boundary located at  $342.1 \text{ m} \pm 1.4 \text{ m}$  in depth (Deng et al., 2013), the location of the K-Pg boundary is  $318 \pm 1.2 \text{ m}$  in depth (Wu et al., 2014).

According to Wu et al. (2014), the sediment accumulation rate was  $\sim 0.1 \text{ m/ky}$ . In previous paleontological studies, the samples for ostracode extraction were taken at  $\sim 1 \text{ m}$  (10 ky) intervals (Qu, 2014), the samples for spores/pollen extraction were taken at  $\sim 15\text{-}25 \text{ m}$  (150-250 ky) intervals where mudstones and siltstones dominate and  $\sim 5\text{-}10 \text{ m}$  (50-100 ky) intervals in the varicoloured segments (Li et al., 2011), and the samples for charophyte extraction were taken at  $\sim 1 \text{ m}$  (10 ky) intervals (Li, 2013).

## **Materials and Methods**

### **Sample collection**

In the Sifangtai and Mingshui formations, many distinctive calcareous paleosols, or “calcisols” according to the Mack et al. (1993) soil classification, were identified and consist of carbonate nodules, slickensides, mottled colors, and fossil root traces (Huang et al., 2013; Gao et al., 2015) (Fig. DR2). They are interbedded with fluvial, alluvial, and lacustrine sediments. Due to the dehydration and recrystallization of iron hydroxides, the majority of Bk horizons are red in color and a minority are gray in color (Huang et al., 2013). The diameters of paleosol carbonate nodules are between 0.1-3.0 cm.



Paleosols generally form within 2,000-30,000 years from sediment or rock exposed at the earth surface (Kraus, 1999). The morphology of the paleosol nodules (Gile et al., 1966) in SK-In indicates they belong to stage I-II: “few filaments or faint coatings/few to common nodules”, which form in 100s to 1000s of years according to U-series isochron dating of Quaternary examples (Candy et al., 2005). These paleosol carbonates therefore provide a relatively continuous climate record at the time of their formation with temporal resolution better than tens of millennia.

In this study, 51 paleosol carbonates were collected from 44 paleosol Bk horizons of SK-In (Table DR4 and Table DR5). The diameters of the samples range from 1.0 to 3.0 cm. The depths of carbonate nodules (soil depth) below the paleosol surfaces (cm) and the burial depths of paleosols (m) were recorded. In practice, the resolution of burial depth is at a meter scale. Almost all the samples were collected from  $\geq 30$  cm below the paleosol surface, thus minimizing effects from diurnal heating and evaporation (Quade et al., 2013).

#### Sample preparation

A total of 40-50 mg of carbonate powder was drilled from a polished surface of each paleosol nodule by a micro-drill or milled by mortar and pestle. Drill depth was no deeper than 2 mm to avoid drilling secondary carbonate. Carbonate powder from different drill holes was homogenized. Drilling using a micro mill or equivalent system can partially convert aragonite to calcite and may also alter the  $\Delta_{47}$  (Staudigel and Swart, 2016). However, in this study, all the paleosol carbonates are calcite and

drilling rotation speed was set  $<1,500$  rpm to minimize frictional heating and  $\Delta_{47}$  alteration.

#### Sample preservation style

Under optical and cathodoluminescence (CL) microscope all the samples were found to be dominated by dense micrite (except for sample “SK-31”) with sparry calcite constrained to the cracks (Fig. DR3). This fine-grained, homogenous texture indicates that samples are very likely unaltered. In addition, our  $\delta^{18}\text{O}$  and  $\delta^{13}\text{C}$  values are similar to published data indicating no significant alteration (Fig. DR4). An exception is sample “SK-31”, a sandstone with sparry calcite cement (Fig. DR3), that is unlikely to have recorded the original climatic signal.

In addition to obvious diagenetic alteration solid-state reordering of C-O bonds may occur without significant changes of the bulk isotopes and textures of the carbonate (Henkes et al., 2014). The Mingshui Formation is the uppermost strata in Mesozoic and the depth of Cenozoic strata is less than 1 km in this region (Wang et al., 2013a). Therefore, in this study, all of the samples have experienced a short history of burial at a shallow depth ( $<76$  myr and  $<1$  km), which is below the burial limit ( $100^\circ\text{C}$  for  $10^6$ - $10^8$  year) for solid-state C-O bond reordering (Henkes et al., 2014). There is no apparent relationship between  $\Delta_{47}$  temperatures and burial depths or soil depth (below the soil surface) for the soil nodules analyzed, and also a lack of correlation of  $\delta^{18}\text{O}$  value and soil depth (Fig. DR4). In addition, an expected (although weak) negative relationship between  $\delta^{13}\text{C}$  value and soil depth is observed

(Fig. DR4). The correlation between the  $\delta^{18}\text{O}_{\text{water}}$  and  $\Delta_{47}$  temperatures also does not show signs of closed-system alteration (Fig. DR5). This suggests that our results reflect primary conditions and that the samples have, at most, only been slightly influenced by burial diagenesis or solid-state C-O bond reordering (Passey and Henkes, 2012; Henkes et al., 2014).

Notably, our  $\Delta_{47}$  temperatures in Songliao Basin are similar to  $\Delta_{47}$  temperatures of fossil bivalves (Tobin et al., 2014) and paleosol carbonates (Snell et al., 2014) (Fig. DR6) from similar paleolatitudes across the K-Pg boundary interval in North America, which further support the reliability of our results.

#### Clumped isotope analyses

Clumped isotope thermometry of carbonates provides a means of reconstructing the growth temperatures of carbonate minerals by evaluating the extent to which  $^{13}\text{C}$  and  $^{18}\text{O}$  are chemically bound to one another (clumped) within the same carbonate ion group. The technique is based on a homogeneous isotope exchange equilibrium and thus constrains temperature independent of the isotopic composition of waters from which carbonates grew (Eiler, 2011).

The clumped isotope analyses were conducted at Johns Hopkins University in 2013 and 2014 (the lab has now moved to University of Michigan, Ann Arbor) following the methods described in Passey et al. (2010). The  $\text{CO}_2$  was liberated from 10-15 mg carbonate powder in an acid bath containing 105%  $\text{H}_3\text{PO}_4$  at 90 °C for 10 min, then purified and introduced to a Thermo Scientific MAT 253 mass spectrometer

using an automated system. We report  $\Delta_{47}$  values relative to the “absolute reference  
 frame (ARF)” by periodically analyzing aliquots of enriched/depleted  $\text{CO}_2$  that were  
 isotopically equilibrated at  $30^\circ\text{C}$  or heated to  $1000^\circ\text{C}$  (Dennis et al., 2011). We also  
 analyzed carbonate standards, HAF Carrara, NBS-19, or 102-GC-AZ01, alongside  
 samples to monitor system stability and precision. In the first session, the long-term  
 averages are HAF Carrara ( $n = 10$ )  $\Delta_{47} = 0.398 \pm 0.020\text{‰}$  and 102-GC-AZ01 ( $n = 10$ )  
 $\Delta_{47} = 0.698 \pm 0.014\text{‰}$  (ARF, mean  $\pm 1\sigma$  standard deviation). In the second session,  
 the long-term averages are HAF Carrara ( $n = 5$ )  $\Delta_{47} = 0.398 \pm 0.005\text{‰}$ , NBS-19 ( $n=5$ )  
 $\Delta_{47} = 0.405 \pm 0.011\text{‰}$ , and 102-GC-AZ01 ( $n = 9$ )  $\Delta_{47} = 0.695 \pm 0.007\text{‰}$  (ARF, mean  
 $\pm 1\sigma$  standard deviation) (Table DR1). The long term accepted values are HAF  
 Carrara  $\Delta_{47} = 0.396\text{‰}$ , NBS-19  $\Delta_{47} = 0.393\text{‰}$ , and 102-GC-AZ01  $\Delta_{47} = 0.714\text{‰}$ . The  
 observed long-term Standard Deviation (SD) of lab standards is  $0.013\text{‰}$ . The  $^{17}\text{O}$   
 correction was applied (Schauer et al., 2016) and the differences are within  $0.01\text{‰}$ .  
 The parameters in the original CIDS files were changed. According to Daëron et al.  
 (2016), the R13 (VPDB) was changed from 0.0112372 to 0.011180, the R17  
 (VSMOW) changed from 0.0003799 to 0.00038475, and the  $\lambda$  value changed from  
 0.5164 to 0.528.

In 2017, further clumped isotope analyses were conducted at Heidelberg  
 University following the methods described in Kluge et al. (2015). Between 6 to 8 mg  
 of carbonate powder (equivalent to 2-3 mg pure carbonate powder) were reacted for  
 10 minutes in 105% phosphoric acid held at  $90^\circ\text{C}$ . Then  $\text{CO}_2$  gas was purified by  
 passage through a conventional off-line vacuum line with multiple cryogenic traps

and a Porapak-Q trap held at -35 °C. The purified CO<sub>2</sub> gas was analyzed using a MAT 253 Plus mass spectrometer from Thermo Fisher Scientific equipped with 10<sup>13</sup> ohm resistors at masses 47-49 and includes a background monitoring cup. The data are reported relative to the “absolute reference frame (ARF)” by periodically analyzing gas standards that were isotopically equilibrated at 5°C and 90°C or heated to 1000°C (Dennis et al., 2011) and compared with calcite standards, Marble Richter, ETH-1, ETH-2, ETH-3, ETH-4, H-II, and L, alongside samples. The average values (ARF, mean ± 1σ standard deviation) for the measurement period is 0.292 ± 0.015‰ (n = 3) for ETH-1, 0.305 ± 0.006‰ (n = 3) for ETH-2, 0.712 ± 0.014‰ (n = 6) for H-II and L, and 0.396 ± 0.019‰ (n = 3) for Marble Richter. The observed long-term Standard Deviation (SD) of lab standards is 0.013‰. The <sup>17</sup>O correction was applied as described above (Schauer et al., 2016).

The Δ<sub>47</sub> temperatures are calculated using the calibration of Passey and Henkes (2012) with an acid temperature correction of 0.082% (Defliese et al., 2015). The δ<sup>18</sup>O<sub>water</sub> (soil water) are calculated from the Δ<sub>47</sub> temperatures and δ<sup>18</sup>O of paleosol carbonates using the calibration of Kim and O’Neil (1997). The δ<sup>13</sup>C and δ<sup>18</sup>O are reported relative to either the VPDB (mineral) or the VSMOW (water) scales (Table DR1 and DR2). Four samples were analyzed in both labs to evaluate the possible differences from the slightly different methods and machines used in Johns Hopkins and Heidelberg. This showed only very small differences in the δ<sup>13</sup>C, the δ<sup>18</sup>O, the Δ<sub>47</sub>, and the δ<sup>18</sup>O<sub>water</sub> values (Fig. DR7), and therefore would not have any effect on the interpretations of the results.

#### Calculation of average stable and clumped isotope values

Average  $\delta^{13}\text{C}$  and  $\delta^{18}\text{O}$  values are calculated as the mean of  $n$  (2-3) replicates with error taken as 1 standard deviation (SD). Average  $\Delta_{47}$  values are calculated as the mean of  $n$  (2-3) replicates with error taken as 1 standard error (SE) (Table DR4). The SE of  $\Delta_{47}$  equal to SD divided by the square root of  $n$  (2-3). When SD of a sample is less than the observed long-term SD of lab standards (0.013‰), 0.013‰ is assigned as the SD of the sample. Then the  $\Delta_{47}$  temperatures and  $\delta^{18}\text{O}_{\text{water}}$  values are calculated from average  $\Delta_{47}$  values and average  $\delta^{18}\text{O}$  values. The 1 SE of  $\Delta_{47}$  temperatures and  $\delta^{18}\text{O}_{\text{water}}$  values are calculated by Gaussian error propagation. For most samples, the uncertainties are relatively consistent, generally lower than 5 °C. The relatively large uncertainties may be due to the heterogeneity of the samples. We did notice a gradual increase in the uncertainties. In this study, the uncertainties of  $\Delta_{47}$  temperatures are calculated by Gaussian error propagation and the  $\Delta_{47}$  values are part of the denominator in the equation. According to the equation, the relatively lower  $\Delta_{47}$  values (higher temperatures) for older (Campanian) samples would lead to a higher uncertainty. Finally, the  $\Delta_{47}$  temperatures of samples from the same burial depth are averaged and treated equally, using the equation as the inverse variance weighted mean (Table DR4 and Table DR5).

#### $\Delta_{47}$ -Temperature calibrations

Different  $\Delta_{47}$ -temperature calibrations possess slightly different slopes and intercepts, which produces different results. Four of them are evaluated here (Table DR1 and DR2), these are calibrations from Passey and Henkes (2012), Defliese et al. (2015), Kluge et al. (2015), and Kelson et al. (2017). The acid temperature correction of 0.082‰ was adopted from Defliese et al. (2015).

The temperature curves generated by these calibrations show similar trends but with slightly different amplitudes (no more than 5 °C). The calibration of Passey and Henkes (2012) with an acid temperature correction of 0.082‰ (Defliese et al., 2015) was used. The controversies regarding  $\Delta_{47}$ -temperature calibrations are of minor importance for this study as almost all calibrations produce values that overlap in the investigated temperature interval (Kluge et al., 2015).

#### Calculation of paleo-atmospheric CO<sub>2</sub> concentrations

The carbon isotopes of paleosol carbonate is mainly derived from two different  $\delta^{13}\text{C}$  sources, the atmospheric CO<sub>2</sub> and the soil-respired CO<sub>2</sub>. Therefore, the carbon isotope values of pedogenic carbonates will rise or fall alongside the variations of atmospheric CO<sub>2</sub> concentrations (Breecker and Retallack, 2014). The equations of paleo-atmospheric CO<sub>2</sub> concentration are:

$$P_a = P_r \times (\delta^{13}C_s - 1.0044\delta^{13}C_r - 4.4) / (\delta^{13}C_a - \delta^{13}C_s) \quad (1)$$

$$\delta^{13}C_s = (\delta^{13}C_c + 1000) / [(11.98 - 0.12T) / 1000 + 1] - 1000 \quad (2)$$

263

$$\delta^{13}C_a = \delta^{13}C_{ocean} - 7.9 \quad (3)$$

265

$$\delta^{13}C_o = 1.1\delta^{13}C_a - 18.67 \quad (4)$$

267

$$\delta^{13}C_r = \delta^{13}C_o - 1 \quad (5)$$

269

$$P_r = 35.3D_s + 588 \quad (6)$$

271

$$D_s = D_p / [-0.62 / (0.38 / e^{0.17K} - 1)] \quad (7)$$

273

274 where  $P_a$  is the atmospheric CO<sub>2</sub> concentration (ppmv),  $P_r$  is the soil-respired  
275 CO<sub>2</sub> concentration (ppmv), and the  $\delta^{13}C_s$ ,  $\delta^{13}C_r$ , and  $\delta^{13}C_a$  are the stable carbon  
276 isotope compositions (‰) of soil CO<sub>2</sub>, soil-respired CO<sub>2</sub>, and the atmospheric CO<sub>2</sub>,  
277 respectively.  $K$  (km) is the estimated thickness overburden of the samples (burial  
278 depth), and  $D_s/D_p$  (cm) are the original/buried soil depths carbonate nodules below the  
279 paleosol surfaces (Breecker and Retallack, 2014).

280 The  $\delta^{13}C_s$  can be determined from the carbon isotope composition of the  
281 pedogenic carbonate ( $\delta^{13}C_c$ ) and the formation temperature of the pedogenic  
282 carbonate ( $T$ :  $\Delta_{47}$  temperature) using the “Eq. (2)”. We estimated the  $\delta^{13}C_a$  through  
283 the average  $\delta^{13}C$  values of planktonic foraminifera ( $\delta^{13}C_{ocean}$ ) (Thibault et al., 2012),  
284 and -7.9‰ was assumed as the isotopic equilibrium fractionation value between the



285 ocean and the atmospheric CO<sub>2</sub> (Passey and Cerling, 2002). The  $\delta^{13}C_r$  can be  
286 calculated from the organic matter ( $\delta^{13}C_o$ ) in the paleosol (Breecker and Retallack,  
287 2014), and the  $\delta^{13}C_o$  in turn can be estimated from the  $\delta^{13}C_a$ . The standard errors of  
288 the atmospheric CO<sub>2</sub> concentration ( $P_a$ ) are calculated using the Gaussian error  
289 propagation (Table DR3). The equations are those of Breecker and Retallack (2014).

**Supplementary references:**

- Batenburg, S. J., Gale, A. S., Sprovieri, M., Hilgen, F. J., Thibault, N., Boussaha, M., and Orue-Etxebarria, X., 2014, An astronomical time scale for the Maastrichtian based on the Zumaia and Sopelana sections (Basque country, northern Spain): *Journal of the Geological Society*, v. 171, no. 2, p. 165-180.
- Breecker, D. O., and Retallack, G. J., 2014, Refining the pedogenic carbonate atmospheric CO<sub>2</sub> proxy and application to Miocene CO<sub>2</sub>: *Palaeogeography, Palaeoclimatology, Palaeoecology*, v. 406, p. 1-8.
- Candy, I., Black, S., and Sellwood, B. W., 2005, U-series isochron dating of immature and mature calcretes as a basis for constructing Quaternary landform chronologies for the Sorbas basin, southeast Spain: *Quaternary Research*, v. 64, no. 1, p. 100-111.
- Chamberlain, C. P., et al., 2013, Stable isotopic evidence for climate and basin evolution of the Late Cretaceous Songliao basin, China: *Palaeogeography, Palaeoclimatology, Palaeoecology*, v. 385, p. 106-124.
- Clyde, W. C., Ramezani, J., Johnson, K. R., Bowring, S. A., and Jones, M. M., 2016, Direct high-precision U-Pb geochronology of the end-Cretaceous extinction and calibration of Paleocene astronomical timescales: *Earth and Planetary Science Letters*, v. 452, p. 272-280.
- Daëron, M., Blamart, D., Peral, M., and Affek, H. P., 2016, Absolute isotopic abundance ratios and the accuracy of  $\Delta 47$  measurements: *Chemical Geology*, v. 442, p. 83-96.
- Defliese, W. F., Hren, M. T., and Lohmann, K. C., 2015, Compositional and temperature effects of phosphoric acid fractionation on  $\Delta 47$  analysis and implications for discrepant calibrations: *Chemical Geology*, v. 396, p. 51-60.

312 Deng, C. L., He, H. Y., Pan, Y. X., and Zhu, R. X., 2013, Chronology of the terrestrial Upper  
 313 Cretaceous in the Songliao Basin, northeast Asia: *Palaeogeography, Palaeoclimatology,*  
 314 *Palaeoecology*, v. 385, p. 44-54.  
 315 Dennis, K. J., Affek, H. P., Passey, B. H., Schrag, D. P., and Eiler, J. M., 2011, Defining an absolute  
 316 reference frame for 'clumped' isotope studies of CO<sub>2</sub>: *Geochimica et Cosmochimica Acta*, v.  
 317 75, no. 22, p. 7117-7131.  
 318 Eagle, R., et al., 2013, The influence of temperature and seawater carbonate saturation state on <sup>13</sup>C-<sup>18</sup>O  
 319 bond ordering in bivalve mollusks: *Biogeosciences Discuss*, v. 10, p. 157-194.  
 320 Eiler, J. M., 2011, Paleoclimate reconstruction using carbonate clumped isotope thermometry:  
 321 *Quaternary Science Reviews*, v. 30, no. 25-26, p. 3575-3588.  
 322 Gao, Y., Ibarra, D. E., Wang, C., Caves, J. K., Chamberlain, C. P., Graham, S. A., and Wu, H., 2015,  
 323 Mid-latitude terrestrial climate of East Asia linked to global climate in the Late Cretaceous:  
 324 *Geology*, v. 43, no. 4, p. 287-290.  
 325 Ghosh, P., Adkins, J., Affek, H., Balta, B., Guo, W., Schauble, E. A., Schrag, D., and Eiler, J. M.,  
 326 2006, <sup>13</sup>C-<sup>18</sup>O bonds in carbonate minerals: A new kind of paleothermometer: *Geochimica et*  
 327 *Cosmochimica Acta*, v. 70, no. 6, p. 1439-1456.  
 328 Gile, L. H., Peterson, F. F., and Grossman, R. B., 1966, Morphological and genetic sequences of  
 329 carbonate accumulation in desert soils: *Soil Science*, v. 101, no. 5, p. 347-360.  
 330 Gradstein, F. M., Ogg, G., and Schmitz, M., 2012, The Geologic Time Scale 2012 2-Volume Set,  
 331 Amsterdam, Elsevier.

332 He, H., Deng, C., Wang, P., Pan, Y., and Zhu, R., 2012, Toward age determination of the termination  
 333 of the Cretaceous Normal Superchron: *Geochemistry, Geophysics, Geosystems*, v. 13, no. 2,  
 334 p. Q02002.

335 Henkes, G. A., Passey, B. H., Grossman, E. L., Shenton, B. J., Pérez-Huerta, A., and Yancey, T. E.,  
 336 2014, Temperature limits for preservation of primary calcite clumped isotope  
 337 paleotemperatures: *Geochimica et Cosmochimica Acta*, v. 139, p. 362-382.

338 Henkes, G. A., Passey, B. H., Wanamaker Jr, A. D., Grossman, E. L., Ambrose Jr, W. G., and Carroll,  
 339 M. L., 2013, Carbonate clumped isotope compositions of modern marine mollusk and  
 340 brachiopod shells: *Geochimica et Cosmochimica Acta*, v. 106, p. 307-325.

341 Huang, C., Retallack, G. J., Wang, C., and Huang, Q., 2013, Paleatmospheric  $p\text{CO}_2$  fluctuations  
 342 across the Cretaceous-Tertiary boundary recorded from paleosol carbonates in NE China:  
 343 *Palaeogeography, Palaeoclimatology, Palaeoecology*, v. 385, p. 95-105.

344 Husson, D., Galbrun, B., Laskar, J., Hinnov, L. A., Thibault, N., Gardin, S., and Locklair, R. E., 2011,  
 345 Astronomical calibration of the Maastrichtian (Late Cretaceous): *Earth and Planetary Science*  
 346 *Letters*, v. 305, no. 3-4, p. 328-340.

347 Kelson, J. R., Huntington, K. W., Schauer, A. J., Saenger, C., and Lechler, A. R., 2017, Toward a  
 348 universal carbonate clumped isotope calibration: Diverse synthesis and preparatory methods  
 349 suggest a single temperature relationship: *Geochimica et Cosmochimica Acta*, v. 197, p. 104-  
 350 131.

351 Kim, S.-T., and O'Neil, J. R., 1997, Equilibrium and nonequilibrium oxygen isotope effects in synthetic  
 352 carbonates: *Geochimica et Cosmochimica Acta*, v. 61, no. 16, p. 3461-3475.

353 Kluge, T., John, C. M., Jourdan, A.-L., Davis, S., and Crawshaw, J., 2015, Laboratory calibration of  
 354 the calcium carbonate clumped isotope thermometer in the 25-250 °C temperature range:  
 355 *Geochimica et Cosmochimica Acta*, v. 157, p. 213-227.

356 Kraus, M. J., 1999, Paleosols in clastic sedimentary rocks: their geologic applications: *Earth-Science*  
 357 *Reviews*, v. 47, no. 1-2, p. 41-70.

358 Li, J., Batten, D. J., and Zhang, Y., 2011, Palynological record from a composite core through Late  
 359 Cretaceous-early Paleocene deposits in the Songliao Basin, Northeast China and its  
 360 biostratigraphic implications: *Cretaceous Research*, v. 32, no. 1, p. 1-12.

361 Li, S., 2012, Late Cretaceous-early Paleogene charophytes from Songliao Basin, North China: SK1  
 362 cores [Master thesis]: China University of Geosciences, Beijing, 64 p. (in Chinese with  
 363 English abstract)

364 Mack, G. H., James, W. C., and Monger, H. C., 1993, Classification of paleosols: *Geological Society*  
 365 *of America Bulletin*, v. 105, no. 2, p. 129-136.

366 Passey, B. H., and Cerling, T. E., 2002, Tooth enamel mineralization in ungulates: implications for  
 367 recovering a primary isotopic time-series: *Geochimica et Cosmochimica Acta*, v. 66, no. 18, p.  
 368 3225-3234.

369 Passey, B. H., and Henkes, G. A., 2012, Carbonate clumped isotope bond reordering and  
 370 geospeedometry: *Earth and Planetary Science Letters*, v. 351-352, p. 223-236.

371 Passey, B. H., Levin, N. E., Cerling, T. E., Brown, F. H., and Eiler, J. M., 2010, High-temperature  
 372 environments of human evolution in East Africa based on bond ordering in paleosol  
 373 carbonates: *Proceedings of the National Academy of Sciences*, v. 107, no. 25, p. 11245-  
 374 11249.

375 Qu, H., 2014, Late Cretaceous–early Paleocene ostracod biostratigraphy and the relationships between  
 376 the stable isotopic compositions of ostracod shells and the paleoenvironments in the Songliao  
 377 Basin, northeast China [Ph.D. thesis]: China University of Geosciences, Beijing, 128 p. (in  
 378 Chinese with English abstract)

379 Quade, J., Eiler, J., Daëron, M., and Achyuthan, H., 2013, The clumped isotope geothermometer in soil  
 380 and paleosol carbonate: *Geochimica et Cosmochimica Acta*, v. 105, p. 92-107.

381 Renne, P. R., Deino, A. L., Hilgen, F. J., Kuiper, K. F., Mark, D. F., Mitchell, W. S., Morgan, L. E.,  
 382 Mundil, R., and Smit, J., 2013, Time Scales of Critical Events Around the Cretaceous-  
 383 Paleogene Boundary: *Science*, v. 339, no. 6120, p. 684-687.

384 Renne, P. R., Sprain, C. J., Richards, M. A., Self, S., Vanderkluysen, L., and Pande, K., 2015, State  
 385 shift in Deccan volcanism at the Cretaceous-Paleogene boundary, possibly induced by impact:  
 386 *Science*, v. 350, no. 6256, p. 76-78.

387 Schauer, A. J., Kelson, J., Saenger, C., and Huntington, K. W., 2016, Choice of  $^{17}\text{O}$  correction affects  
 388 clumped isotope ( $\Delta_{47}$ ) values of  $\text{CO}_2$  measured with mass spectrometry: *Rapid Commun Mass*  
 389 *Spectrom*, v. 30, no. 24, p. 2607-2616.

390 Schoene, B., Samperton, K. M., Eddy, M. P., Keller, G., Adatte, T., Bowring, S. A., Khadri, S. F. R.,  
 391 and Gertsch, B., 2015, U-Pb geochronology of the Deccan Traps and relation to the end-  
 392 Cretaceous mass extinction: *Science*, v. 347, no. 6218, p. 182-184.

393 Scott, R. W., Wan, X., Wang, C., and Huang, Q., 2012, Late Cretaceous chronostratigraphy (Turonian-  
 394 Maastrichtian): SK1 core Songliao Basin, China: *Geoscience Frontiers*, v. 3, no. 4, p. 357-367.

395 Snell, K. E., Koch, P. L., Druschke, P., Foreman, B. Z., and Eiler, J. M., 2014, High elevation of the  
 396 'Nevadaplano' during the Late Cretaceous: *Earth and Planetary Science Letters*, v. 386, p. 52-  
 397 63.

398 Staudigel, P. T., and Swart, P. K., 2016, Isotopic behavior during the aragonite-calcite transition:  
 399 Implications for sample preparation and proxy interpretation: *Chemical Geology*, v. 442, p.  
 400 130-138.

401 Thibault, N., Husson, D., Harlou, R., Gardin, S., Galbrun, B., Huret, E., and Minoletti, F., 2012,  
 402 Astronomical calibration of upper Campanian–Maastrichtian carbon isotope events and  
 403 calcareous plankton biostratigraphy in the Indian Ocean (ODP Hole 762C): Implication for  
 404 the age of the Campanian–Maastrichtian boundary: *Palaeogeography, Palaeoclimatology,*  
 405 *Palaeoecology*, v. 337-338, p. 52-71.

406 Tobin, T. S., Ward, P. D., Steig, E. J., Olivero, E. B., Hilburn, I. A., Mitchell, R. N., Diamond, M. R.,  
 407 Raub, T. D., and Kirschvink, J. L., 2012, Extinction patterns,  $\delta^{18}\text{O}$  trends, and  
 408 magnetostratigraphy from a southern high-latitude Cretaceous-Paleogene section: Links with  
 409 Deccan volcanism: *Palaeogeography, Palaeoclimatology, Palaeoecology*, v. 350-352, p. 180-  
 410 188.

411 Tobin, T. S., Wilson, G. P., Eiler, J. M., and Hartman, J. H., 2014, Environmental change across a  
 412 terrestrial Cretaceous-Paleogene boundary section in eastern Montana, USA, constrained by  
 413 carbonate clumped isotope paleothermometry: *Geology*, v. 42, no. 4, p. 351-354.

414 Wan, X., Zhao, J., Scott, R. W., Wang, P., Feng, Z., Huang, Q., and Xi, D., 2013, Late Cretaceous  
 415 stratigraphy, Songliao Basin, NE China: SK1 cores: *Palaeogeography, Palaeoclimatology,*  
 416 *Palaeoecology*, v. 385, p. 31-43.

417 Wang, C., Feng, Z., Zhang, L., Huang, Y., Cao, K., Wang, P., and Zhao, B., 2013a, Cretaceous  
 418 paleogeography and paleoclimate and the setting of SKI borehole sites in Songliao Basin,  
 419 northeast China: *Palaeogeography, Palaeoclimatology, Palaeoecology*, v. 385, p. 17-30.

420 Wang, C., Scott, R. W., Wan, X., Graham, S. A., Huang, Y., Wang, P., Wu, H., Dean, W. E., and  
 421 Zhang, L., 2013b, Late Cretaceous climate changes recorded in Eastern Asian lacustrine  
 422 deposits and North American Epihercynian sea strata: *Earth-Science Reviews*, v. 126, p. 275-299.

423 Wang, T., Ramezani, J., Wang, C., Wu, H., He, H., and Bowring, S. A., 2016, High-precision U-Pb  
 424 geochronologic constraints on the Late Cretaceous terrestrial cyclostratigraphy and  
 425 geomagnetic polarity from the Songliao Basin, Northeast China: *Earth and Planetary Science*  
 426 *Letters*, v. 446, p. 37-44.

427 Wilf, P., Johnson, K. R., and Huber, B. T., 2003, Correlated terrestrial and marine evidence for global  
 428 climate changes before mass extinction at the Cretaceous-Paleogene boundary: *Proceedings of*  
 429 *the National Academy of Sciences*, v. 100, no. 2, p. 599-604.

430 Wilson, G. P., DeMar, D. G., and Carter, G., 2014, Extinction and survival of salamander and  
 431 salamander-like amphibians across the Cretaceous-Paleogene boundary in northeastern  
 432 Montana, USA: *Geological Society of America Special Papers*, v. 503, p. 271-297.

433 Wu, H., Zhang, S., Hinnov, L. A., Jiang, G., Yang, T., Li, H., Wan, X., and Wang, C., 2014,  
 434 Cyclostratigraphy and orbital tuning of the terrestrial upper Santonian-Lower Danian in  
 435 Songliao Basin, northeastern China: *Earth and Planetary Science Letters*, v. 407, p. 82-95.



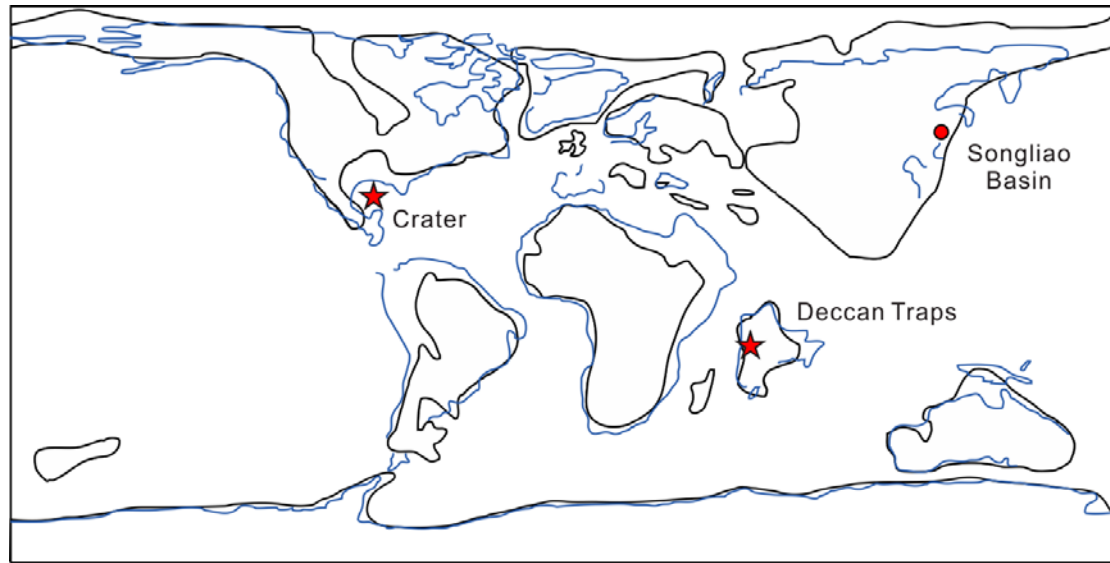

**Fig. DR1. Schematic paleogeography map.** Paleogeographic map of the K-Pg boundary interval showing the locations of the Chicxulub impact crater, the Deccan Traps, and the Songliao Basin (Wang et al., 2013a).

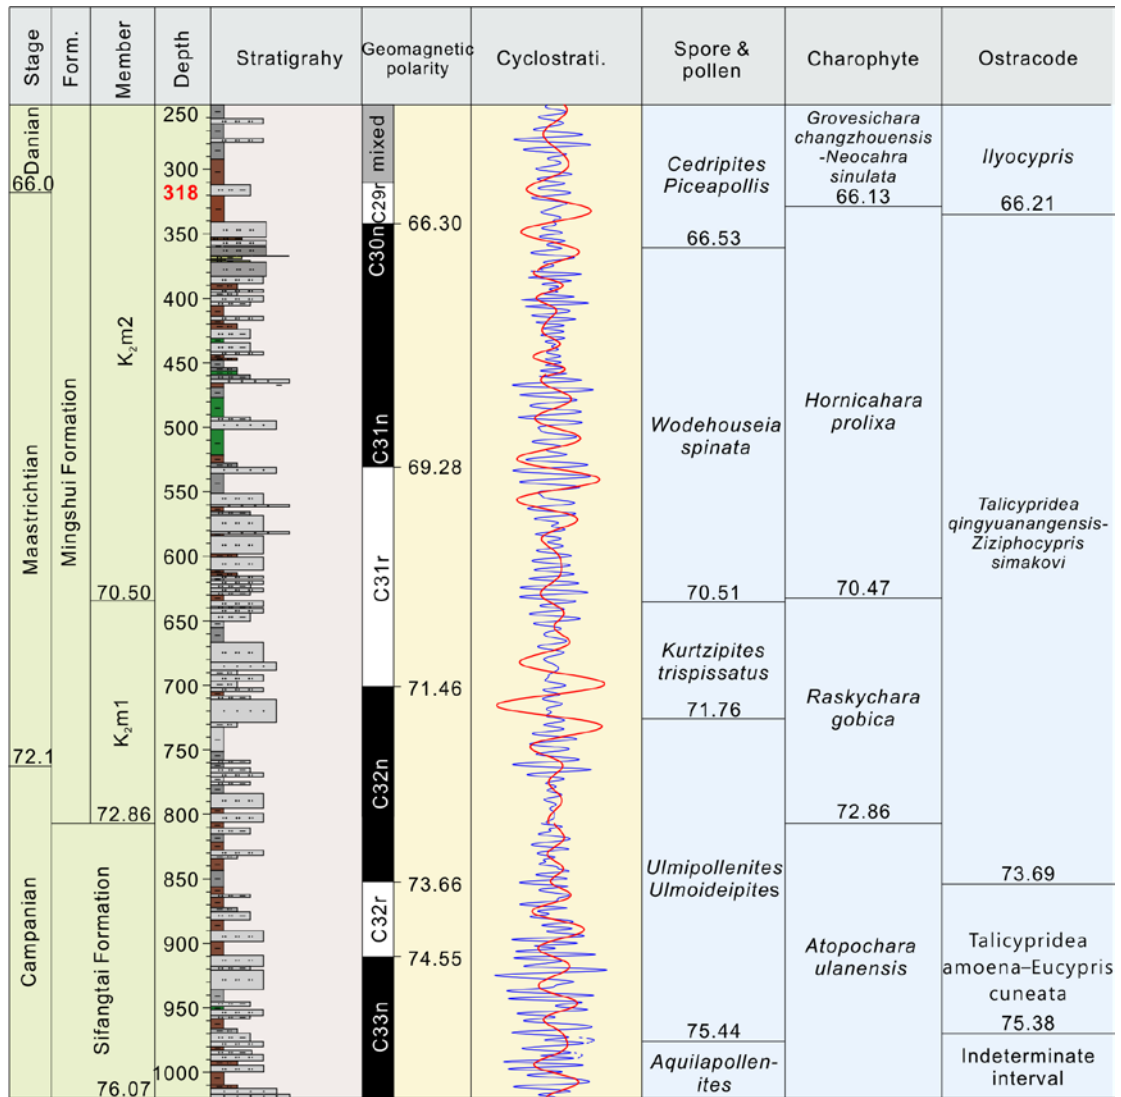

Fig. DR2. **Age model.** Integrated stratigraphic frame of the upper part of Sifangtai Formation and Mingshui Formation of the SK-In based on magnetostratigraphy (Deng et al., 2013), cyclostratigraphy (Wu et al., 2014), and biostratigraphy (Wan et al., 2013; Qu, 2014). The 405-kyr (red) and 100-kyr (blue) cycles are from Wu et al. (2014). The red bold number “318” in the “Depth” column represent the location of the K-Pg boundary. “Cyclostrati” represents “Cyclostratigraphy”. “Form.” represents “Formation”. Modified after Wan et al. (2013) and Wu et al. (2014).

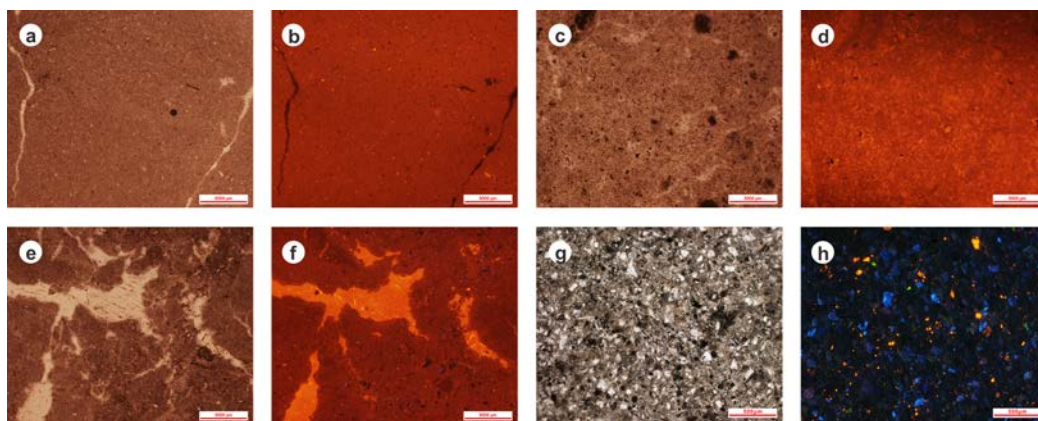

Fig. DR3. **Petrographic images.** (a-d) Optical and cathodoluminescence

petrographic images for dense micrite. (e-f) Optical and cathodoluminescence

petrographic images for dense micrite with fractures containing secondary spar. (g-h)

Optical and cathodoluminescence petrographic images for the altered sample "SK-

31".

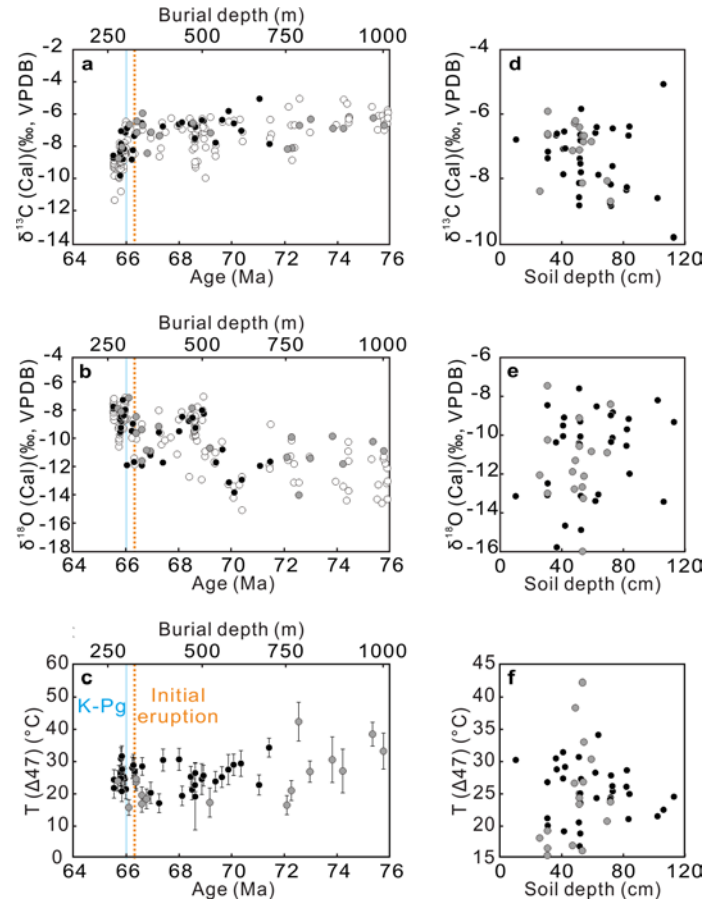

**Fig. DR4. The results of stable and clumped isotopes analyses.** (a) The  $\delta^{13}\text{C}$  vs age/burial depth. (b) The  $\delta^{18}\text{O}$  vs age/burial depth. (c) The  $\Delta_{47}$  temperature vs age/burial depth. (d) The  $\delta^{13}\text{C}$  vs soil depth. (e) The  $\delta^{18}\text{O}$  vs soil depth. (f) The  $\Delta_{47}$  temperature vs soil depth. The black (Johns Hopkins) and grey (Heidelberg) circles represent results of this study, and the white circles represent the previous published data from the Songliao Basin (Huang et al., 2013; Gao et al., 2015). The average  $1\sigma$  standard error in  $\delta^{13}\text{C}$  and  $\delta^{18}\text{O}$  are  $< 0.07\text{‰}$  and  $< 0.06\text{‰}$ , respectively. The  $1\sigma$  standard error in the  $\Delta_{47}$  temperatures are shown as vertical bars. The dotted orange line marks the onset of the main Deccan eruptions at  $66.288 \pm 0.085$  Ma (Schoene et al., 2015) or  $66.38 \pm 0.05$  Ma (Renne et al., 2015). The dotted blue line marks the K-Pg boundary at  $\sim 66.00$  Ma (Wu et al., 2014) or  $66.043 \pm 0.086$  Ma (Renne et al.,

466 2013) and the Chicxulub impact occurred at  $66.038 \text{ Ma} \pm 0.098 \text{ Ma}$  (Renne et al.,  
467 2013). The bulk and clumped isotope results for all the samples are presented in Table  
468 DR1, DR2, and DR4.

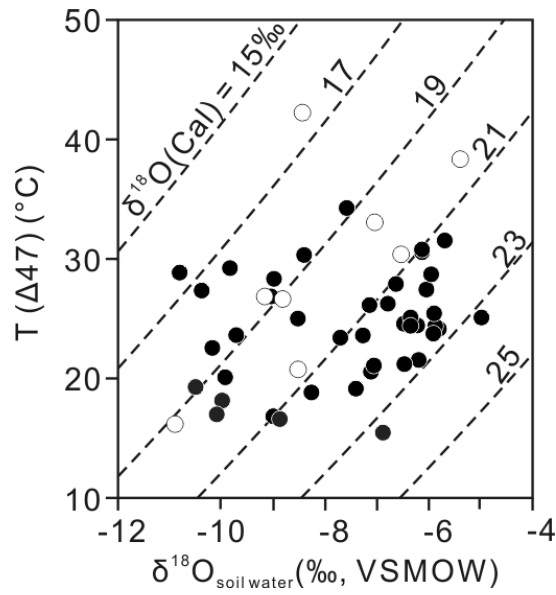

469

470 Fig. DR5. **The  $\delta^{18}\text{O}_{\text{water}}$  values (soil water) vs  $\Delta_{47}$  temperature.** Contours of  $\delta^{18}\text{O}$   
 471 (Cal) (‰, VSMOW) calculated from the calibration Kim and O'Neil (1997). The  
 472 black and white circles represent results from Maastrichtian and Campanian,  
 473 respectively. There is no statistically correlation between  $\Delta_{47}$  temperature and  
 474  $\delta^{18}\text{O}_{\text{water}}$  values in the Maastrichtian, whereas in the Campanian there is a positive  
 475 relationship.

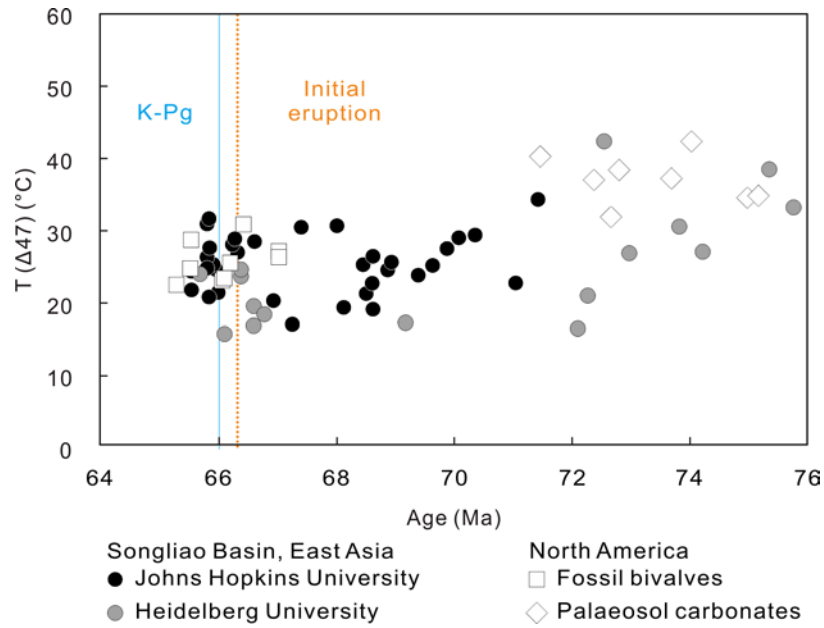

Fig. DR6. A comparison between  $\Delta_{47}$  temperature from the Songliao Basin and North America. The black (Johns Hopkins) and gray (Heidelberg) circles represent  $\Delta_{47}$  temperatures of paleosol carbonates in the Songliao Basin. The white squares and diamonds represent the  $\Delta_{47}$  temperatures of fossil bivalves (Tobin et al., 2014) and paleosol carbonates (Snell et al., 2014) from similar paleolatitudes in North America (see legends).

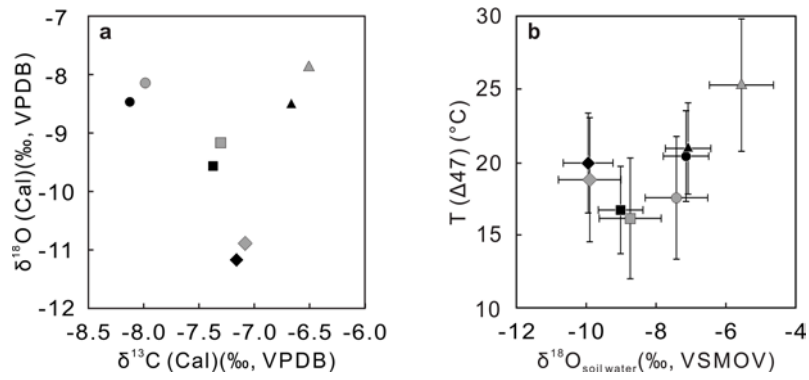

Fig. DR7. **A comparison between analyses of same samples from different labs.**

(a) The  $\delta^{13}\text{C}$  vs  $\delta^{18}\text{O}$ . (b) The  $\Delta_{47}$  temperature vs the  $\delta^{18}\text{O}_{\text{water}}$  values. The 1σ standard errors are shown as vertical/horizontal bars.



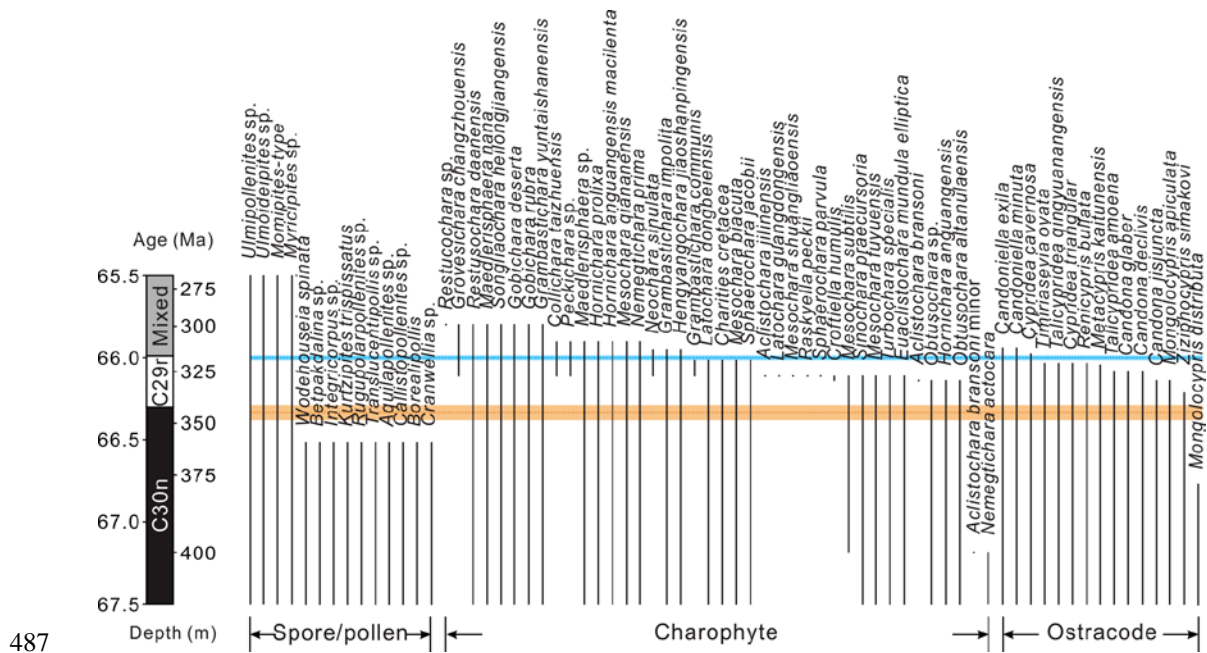

Fig. DR8. Fossil range data from the Songliao Basin across the K-Pg boundary

interval. The fossil range data from the Songliao Basin is from Scott et al. (2012).

The dotted orange line marks the onset of the main Deccan eruptions at  $66.288 \pm 0.085$  Ma (Schoene et al., 2015) or  $66.38 \text{ Ma} \pm 0.05$  (Renne et al., 2015). The

magnetozones are derived from Deng et al. (2013) and Wu et al. (2014). The dotted

blue line marks the K-Pg boundary at  $\sim 66.00$  Ma (Wu et al., 2014) or  $66.043 \pm 0.086$

Ma (Renne et al., 2013) and the Chicxulub impact occurred at  $66.038 \text{ Ma} \pm 0.098$  Ma

(Renne et al., 2013).

Table DR4 Results of clumped isotope analyses.

| Sample ID | Age <sup>*</sup><br>(Ma) | Dp <sup>†</sup><br>(cm) | Burial depth<br>(km) | Ds <sup>†</sup><br>(cm) | N <sup>‡</sup> | $\delta^{13}\text{C}^{\S}$<br>(‰, VPDB) | $\delta^{18}\text{O}^{\S}$<br>(‰, VPDB) | $\Delta 47^{\P}$<br>(‰, ARF) | T( $\Delta 47$ ) <sup>  </sup><br>(°C) | $\delta^{18}\text{O}_{\text{water}}^{**}$<br>(‰, VSMOW) |
|-----------|--------------------------|-------------------------|----------------------|-------------------------|----------------|-----------------------------------------|-----------------------------------------|------------------------------|----------------------------------------|---------------------------------------------------------|
| SK-01     | 65.52                    | 70                      | 0.269                | 72                      | 2              | -8.75                                   | -7.91                                   | 0.694 (0.009)                | 23.9 (3.2)                             | -5.8 (0.66)                                             |
| SK-03     | 65.52                    | 100                     | 0.269                | 103                     | 2              | -8.59                                   | -7.76                                   | 0.702 (0.009)                | 21.3 (3.2)                             | -6.2 (0.65)                                             |
| SK-06     | 65.78                    | 80                      | 0.297                | 82                      | 2              | -8.35                                   | -9.64                                   | 0.688 (0.009)                | 25.9 (3.3)                             | -7.1 (0.66)                                             |
| SK-07     | 65.78                    | 110                     | 0.297                | 113                     | 2              | -9.80                                   | -8.66                                   | 0.693 (0.009)                | 24.4 (3.3)                             | -6.5 (0.66)                                             |
| SK-08     | 65.79                    | 50                      | 0.298                | 52                      | 2              | -8.57                                   | -9.54                                   | 0.675 (0.009)                | 30.6 (3.5)                             | -6.1 (0.67)                                             |
| SK-09     | 65.81                    | 40                      | 0.300                | 41                      | 3              | -7.85                                   | -9.25                                   | 0.673 (0.010)                | 31.3 (3.9)                             | -5.7 (0.76)                                             |
| SK-10     | 65.81                    | 50                      | 0.300                | 52                      | 2              | -8.12                                   | -8.48                                   | 0.705 (0.009)                | 20.4 (3.1)                             | -7.1 (0.65)                                             |
| SK-11     | 65.82                    | 40                      | 0.301                | 41                      | 2              | -7.07                                   | -8.81                                   | 0.684 (0.009)                | 27.2 (3.3)                             | -6.0 (0.67)                                             |
| SK-12     | 65.88                    | 50                      | 0.307                | 52                      | 2              | -8.82                                   | -7.28                                   | 0.691 (0.009)                | 24.9 (3.3)                             | -5.0 (0.66)                                             |
| SK-13     | 65.92                    | 70                      | 0.311                | 72                      | 2              | -8.17                                   | -8.39                                   | 0.693 (0.009)                | 24.2 (3.2)                             | -6.2 (0.66)                                             |
| SK-16     | 65.98                    | 30                      | 0.316                | 31                      | 3              | -7.16                                   | -7.97                                   | 0.703 (0.009)                | 21.0 (3.1)                             | -6.5 (0.65)                                             |
| SK-17     | 66.60                    | 30                      | 0.366                | 31                      | 3              | -6.57                                   | -11.92                                  | 0.682 (0.008)                | 28.1 (2.8)                             | -9.0 (0.55)                                             |
| SK-20     | 68.61                    | 70                      | 0.478                | 73                      | 2              | -7.60                                   | -9.31                                   | 0.688 (0.009)                | 26.0 (3.3)                             | -6.8 (0.66)                                             |
| SK-21     | 68.61                    | 50                      | 0.478                | 52                      | 3              | -7.52                                   | -9.27                                   | 0.710 (0.033)                | 18.6 (10.6)                            | -8.3 (2.22)                                             |
| SK-22     | 68.62                    | 50                      | 0.479                | 52                      | 2              | -6.80                                   | -9.26                                   | 0.695 (0.009)                | 23.4 (3.2)                             | -7.3 (0.66)                                             |
| SK-24     | 67.24                    | 50                      | 0.403                | 52                      | 2              | -7.37                                   | -9.58                                   | 0.716 (0.009)                | 16.7 (3.0)                             | -9.0 (0.64)                                             |
| SK-25     | 67.39                    | 10                      | 0.411                | 10                      | 2              | -6.78                                   | -11.72                                  | 0.676 (0.009)                | 30.1 (3.4)                             | -8.4 (0.67)                                             |
| SK-26     | 68.87                    | 60                      | 0.498                | 63                      | 3              | -6.39                                   | -8.02                                   | 0.693 (0.014)                | 24.2 (4.9)                             | -5.9 (1.00)                                             |
| SK-27     | 68.93                    | 70                      | 0.503                | 74                      | 2              | -6.43                                   | -8.26                                   | 0.690 (0.009)                | 25.2 (3.3)                             | -5.9 (0.66)                                             |
| SK-28     | 71.05                    | 100                     | 0.668                | 107                     | 2              | -5.06                                   | -11.95                                  | 0.699 (0.009)                | 22.3 (3.2)                             | -10.2 (0.65)                                            |
| SK-29     | 71.43                    | 60                      | 0.699                | 64                      | 3              | -7.87                                   | -11.65                                  | 0.666 (0.008)                | 34.0 (3.0)                             | -7.6 (0.56)                                             |
| SK-32     | 66.22                    | 70                      | 0.336                | 72                      | 2              | -8.83                                   | -9.48                                   | 0.683 (0.009)                | 27.7 (3.4)                             | -6.6 (0.67)                                             |
| SK-34     | 66.26                    | 80                      | 0.339                | 83                      | 2              | -8.25                                   | -8.97                                   | 0.681 (0.009)                | 28.5 (3.4)                             | -5.9 (0.67)                                             |

|             |       |    |       |    |   |       |        |               |            |              |
|-------------|-------|----|-------|----|---|-------|--------|---------------|------------|--------------|
| SK-35       | 66.31 | 30 | 0.343 | 31 | 2 | -7.36 | -11.68 | 0.686 (0.012) | 26.6 (4.2) | -9.0 (0.83)  |
| SK-42       | 68.00 | 35 | 0.445 | 37 | 2 | -6.64 | -9.50  | 0.676 (0.009) | 30.3 (3.5) | -6.1 (0.67)  |
| SK-43       | 68.12 | 40 | 0.451 | 42 | 2 | -6.53 | -8.48  | 0.709 (0.009) | 19.0 (3.1) | -7.4 (0.65)  |
| SK-45       | 68.45 | 50 | 0.466 | 52 | 2 | -6.62 | -8.64  | 0.691 (0.009) | 24.9 (3.3) | -6.3 (0.66)  |
| SK-46       | 68.50 | 80 | 0.471 | 84 | 2 | -6.66 | -8.53  | 0.703 (0.009) | 20.9 (3.1) | -7.1 (0.65)  |
| SK-51       | 69.39 | 50 | 0.539 | 53 | 2 | -7.79 | -11.71 | 0.695 (0.009) | 23.4 (3.2) | -9.7 (0.66)  |
| SK-52       | 69.64 | 80 | 0.558 | 84 | 2 | -6.37 | -10.80 | 0.691 (0.009) | 24.8 (3.3) | -8.5 (0.66)  |
| SK-53       | 69.88 | 50 | 0.577 | 53 | 2 | -5.83 | -13.11 | 0.685 (0.014) | 27.1 (4.8) | -10.4 (0.96) |
| SK-54       | 70.08 | 35 | 0.594 | 37 | 2 | -6.59 | -13.83 | 0.680 (0.009) | 28.6 (3.4) | -10.8 (0.67) |
| SK-55       | 70.36 | 40 | 0.627 | 43 | 3 | -7.05 | -12.94 | 0.679 (0.011) | 29.0 (4.1) | -9.8 (0.80)  |
| SK-56       | 66.92 | 30 | 0.387 | 31 | 2 | -7.15 | -11.19 | 0.706 (0.010) | 19.9 (3.4) | -9.9 (0.72)  |
|             |       |    |       |    |   |       |        |               |            |              |
| SKnew-01    | 65.69 | 70 | 0.287 | 72 | 2 | -8.69 | -7.93  | 0.695 (0.009) | 23.6 (3.2) | -5.9 (0.66)  |
| SKknew-05   | 66.11 | 30 | 0.327 | 31 | 3 | -6.60 | -7.17  | 0.721 (0.008) | 15.2 (2.5) | -6.9 (0.53)  |
| SKnew-06-01 | 66.39 | 50 | 0.349 | 52 | 3 | -6.40 | -8.50  | 0.693 (0.009) | 24.2 (3.1) | -6.3 (0.62)  |
| SKnew-06-02 | 66.39 | 50 | 0.349 | 52 | 3 | -7.10 | -9.66  | 0.696 (0.008) | 23.2 (2.7) | -7.7 (0.54)  |
| SKnew-07    | 66.60 | 30 | 0.366 | 31 | 3 | -5.90 | -9.40  | 0.717 (0.008) | 16.4 (2.6) | -8.9 (0.56)  |
| SKnew-08    | 66.60 | 30 | 0.366 | 31 | 3 | -6.64 | -11.60 | 0.708 (0.008) | 19.1 (2.6) | -10.5 (0.55) |
| SKnew-09    | 66.78 | 25 | 0.380 | 26 | 3 | -8.38 | -10.85 | 0.712 (0.009) | 17.9 (3.1) | -10.0 (0.65) |
| SKnew-12    | 69.18 | 45 | 0.523 | 47 | 2 | -7.12 | -10.71 | 0.716 (0.014) | 16.8 (4.6) | -10.1 (0.97) |
| SKnew-13    | 72.10 | 50 | 0.753 | 54 | 2 | -8.13 | -11.35 | 0.718 (0.009) | 16.0 (3.0) | -10.9 (0.64) |
| SKnew-14    | 72.28 | 65 | 0.765 | 70 | 2 | -8.06 | -9.93  | 0.704 (0.009) | 20.5 (3.1) | -8.5 (0.65)  |
| SKnew-15    | 72.55 | 50 | 0.784 | 54 | 2 | -6.66 | -14.00 | 0.645 (0.015) | 42.1 (6.1) | -8.4 (1.10)  |
| SKnew-16    | 72.98 | 45 | 0.814 | 49 | 2 | -6.27 | -11.43 | 0.687 (0.009) | 26.5 (3.3) | -8.8 (0.66)  |
| SKnew-18    | 73.83 | 55 | 0.861 | 60 | 2 | -6.84 | -9.88  | 0.676 (0.020) | 30.2 (7.1) | -6.5 (1.39)  |

|          |       |    |       |    |   |       |        |               |            |             |
|----------|-------|----|-------|----|---|-------|--------|---------------|------------|-------------|
| SKnew-20 | 74.23 | 50 | 0.887 | 54 | 2 | -6.84 | -11.81 | 0.686 (0.019) | 26.7 (6.9) | -9.2 (1.36) |
| SKnew-21 | 75.36 | 45 | 0.968 | 49 | 2 | -6.20 | -10.25 | 0.655 (0.009) | 38.2 (3.7) | -5.4 (0.69) |
| SKnew-22 | 75.77 | 50 | 1.001 | 55 | 2 | -6.66 | -10.90 | 0.669 (0.015) | 32.9 (5.6) | -7.0 (1.08) |

\* Age model see Supplementary text.

† Dp/Ds are the burial/original depths carbonate nodules blew the paleosol surfaces.

‡ Number of unique analyses of CO<sub>2</sub> from carbonate.

§ VPDB = Vienna Pee Dee Belemnite. Uncertainties on  $\delta^{13}\text{C}$  and  $\delta^{18}\text{O}$  are < 0.07‰ and 0.06‰ respectively.

¶ ARF = Absolute Reference Frame. With acid correction of 0.082‰. Uncertainty is reported in parentheses. Standard error of  $\Delta 47$ , SE = SD/SQRT (N). When SD of a sample is less than the observed long-term SD of lab standards (0.013‰), the long-term value of 0.013‰ is assigned as the SD of the sample.

|| Calculated using the Equation (5) in Passey and Henkes (2012). Uncertainty is reported in parentheses.

\*\* VSMOW = Vienna Standard Mean Ocean Water. Calculated using the equation reported in Kim and O'Neil (1997). Uncertainty is reported in parentheses.

Table DR5 A summary of climatic parameters.

| Age <sup>*</sup><br>(Ma) | Burial depth<br>(km) | $\delta^{13}\text{C}^\dagger$<br>(‰, VPDB) | $\delta^{18}\text{O}^\dagger$<br>(‰, VPDB) | T( $\Delta 47$ ) <sup>‡</sup><br>(°C) | $\delta^{18}\text{O}_{\text{water}}^\S$<br>(‰, VSMOW) | $p\text{CO}_2^\P$<br>(ppmv) |
|--------------------------|----------------------|--------------------------------------------|--------------------------------------------|---------------------------------------|-------------------------------------------------------|-----------------------------|
| 65.52                    | 0.269                | -8.67                                      | -7.84                                      | 22.6 (2.3)                            | -6.0 (0.46)                                           | 1187 (220)                  |
| 65.69                    | 0.287                | -8.69                                      | -7.93                                      | 23.6 (3.2)                            | -5.9 (0.66)                                           | 1048 (302)                  |
| 65.78                    | 0.297                | -9.07                                      | -9.15                                      | 25.1 (2.3)                            | -6.8 (0.47)                                           | 1180 (217)                  |
| 65.79                    | 0.298                | -8.57                                      | -9.54                                      | 30.6 (3.5)                            | -6.1 (0.67)                                           | 1075 (374)                  |
| 65.81                    | 0.300                | -7.99                                      | -8.87                                      | 24.6 (2.4)                            | -6.5 (0.49)                                           | 938 (250)                   |
| 65.82                    | 0.301                | -7.07                                      | -8.81                                      | 27.2 (3.3)                            | -6.0 (0.67)                                           | 1238 (488)                  |
| 65.88                    | 0.307                | -8.82                                      | -7.28                                      | 24.9 (3.3)                            | -5.0 (0.66)                                           | 800 (283)                   |
| 65.92                    | 0.311                | -8.17                                      | -8.39                                      | 24.2 (3.2)                            | -6.2 (0.66)                                           | 1251 (352)                  |
| 65.98                    | 0.316                | -7.16                                      | -7.97                                      | 21.0 (3.1)                            | -6.5 (0.65)                                           | 806 (381)                   |
| 66.11                    | 0.327                | -6.60                                      | -7.17                                      | 15.2 (2.5)                            | -6.9 (0.53)                                           | 701 (329)                   |
| 66.22                    | 0.336                | -8.83                                      | -9.48                                      | 27.7 (3.4)                            | -6.6 (0.67)                                           | 1059 (307)                  |
| 66.26                    | 0.339                | -8.25                                      | -8.97                                      | 28.5 (3.4)                            | -5.9 (0.67)                                           | 1468 (382)                  |
| 66.31                    | 0.343                | -7.36                                      | -11.68                                     | 26.6 (4.2)                            | -9.0 (0.83)                                           | 863 (414)                   |
| 66.39                    | 0.349                | -6.75                                      | -9.08                                      | 22.6 (2.0)                            | -7.1 (0.41)                                           | 1285 (308)                  |
| 66.60                    | 0.366                | -6.37                                      | -10.97                                     | 20.9 (1.5)                            | -9.5 (0.32)                                           | 870 (237)                   |
| 66.78                    | 0.380                | -8.38                                      | -10.85                                     | 17.9 (3.1)                            | -10.0 (0.65)                                          | 348 (189)                   |
| 66.92                    | 0.387                | -7.15                                      | -11.19                                     | 19.9 (3.4)                            | -9.9 (0.72)                                           | 665 (317)                   |
| 67.24                    | 0.403                | -7.37                                      | -9.58                                      | 16.7 (3.0)                            | -9.0 (0.64)                                           | 806 (281)                   |
| 67.39                    | 0.411                | -6.78                                      | -11.72                                     | 30.1 (3.4)                            | -8.4 (0.67)                                           | 587 (476)                   |
| 68.00                    | 0.445                | -6.64                                      | -9.50                                      | 30.3 (3.5)                            | -6.1 (0.67)                                           | 1228 (523)                  |
| 68.12                    | 0.451                | -6.53                                      | -8.48                                      | 19.0 (3.1)                            | -7.4 (0.65)                                           | 987 (387)                   |
| 68.45                    | 0.466                | -6.62                                      | -8.64                                      | 24.9 (3.3)                            | -6.3 (0.66)                                           | 1333 (451)                  |
| 68.50                    | 0.471                | -6.66                                      | -8.53                                      | 20.9 (3.1)                            | -7.1 (0.65)                                           | 1686 (422)                  |
| 68.61                    | 0.478                | -7.56                                      | -9.29                                      | 25.4 (3.2)                            | -6.9 (0.63)                                           | 1132 (286)                  |
| 68.62                    | 0.479                | -6.80                                      | -9.26                                      | 23.4 (3.2)                            | -7.3 (0.66)                                           | 1212 (411)                  |
| 68.87                    | 0.498                | -6.39                                      | -8.02                                      | 24.2 (4.9)                            | -5.9 (1.00)                                           | 1609 (516)                  |
| 68.93                    | 0.503                | -6.43                                      | -8.26                                      | 25.2 (3.3)                            | -5.9 (0.66)                                           | 1850 (499)                  |
| 69.18                    | 0.523                | -7.12                                      | -10.71                                     | 16.8 (4.6)                            | -10.1 (0.97)                                          | 813 (316)                   |
| 69.39                    | 0.539                | -7.79                                      | -11.71                                     | 23.4 (3.2)                            | -9.7 (0.66)                                           | 894 (309)                   |
| 69.64                    | 0.558                | -6.37                                      | -10.80                                     | 24.8 (3.3)                            | -8.5 (0.66)                                           | 2175 (534)                  |
| 69.88                    | 0.577                | -5.83                                      | -13.11                                     | 27.1 (4.8)                            | -10.4 (0.96)                                          | 1856 (647)                  |
| 70.08                    | 0.594                | -6.59                                      | -13.83                                     | 28.6 (3.4)                            | -10.8 (0.67)                                          | 1264 (532)                  |
| 70.36                    | 0.627                | -7.05                                      | -12.94                                     | 29.0 (4.1)                            | -9.8 (0.80)                                           | 1248 (492)                  |
| 71.05                    | 0.668                | -5.06                                      | -11.95                                     | 22.3 (3.2)                            | -10.2 (0.65)                                          | 3460 (719)                  |
| 71.43                    | 0.699                | -7.87                                      | -11.65                                     | 34.0 (3.0)                            | -7.6 (0.56)                                           | 1553 (454)                  |
| 72.10                    | 0.753                | -8.13                                      | -11.35                                     | 16.0 (3.0)                            | -10.9 (0.64)                                          | 680 (237)                   |
| 72.28                    | 0.765                | -8.06                                      | -9.93                                      | 20.5 (3.1)                            | -8.5 (0.65)                                           | 992 (291)                   |
| 72.55                    | 0.784                | -6.66                                      | -14.00                                     | 42.1 (6.1)                            | -8.4 (1.10)                                           | 2454 (885)                  |
| 72.98                    | 0.814                | -6.27                                      | -11.43                                     | 26.5 (3.3)                            | -8.8 (0.66)                                           | 1473 (521)                  |
| 73.83                    | 0.861                | -6.84                                      | -9.88                                      | 30.2 (7.1)                            | -6.5 (1.39)                                           | 1660 (609)                  |
| 74.23                    | 0.887                | -6.84                                      | -11.81                                     | 26.7 (6.9)                            | -9.2 (1.36)                                           | 1396 (533)                  |

|       |       |       |        |            |             |            |
|-------|-------|-------|--------|------------|-------------|------------|
| 75.36 | 0.968 | -6.20 | -10.25 | 38.2 (3.7) | -5.4 (0.69) | 2203 (775) |
| 75.77 | 1.001 | -6.66 | -10.90 | 32.9 (5.6) | -7.0 (1.08) | 1738 (616) |

\* Age model see Supplementary text.

† VPDB = Vienna Pee Dee Belemnite. Uncertainties on  $\delta^{13}\text{C}$  and  $\delta^{18}\text{O}$  are < 0.07‰ and 0.06‰ respectively.

‡ Calculated using the Equation (5) in Passey and Henkes (2012). Uncertainty is reported in parentheses.

§ VSMOW = Vienna Standard Mean Ocean Water. Calculated using the equation reported in Kim and O'Neil (1997).

Uncertainty is reported in parentheses.

¶ Calculated using the equations of Breecker and Retallack (2014). Uncertainty is reported in parentheses.
